# Supplementary material for: Retinoic acid alleviates the reduction of Akt and Bad phosphorylation and regulates Bcl-2 family protein interactions in animal models of ischemic stroke
Source: PubMed Central journal article supplement (PMC11098415; doi:10.1371/journal.pone.0303213), 2024-05-16
Supplement: pone.0303213.s002.pdf [file pone.0303213.s002.pdf]

Figure 1F

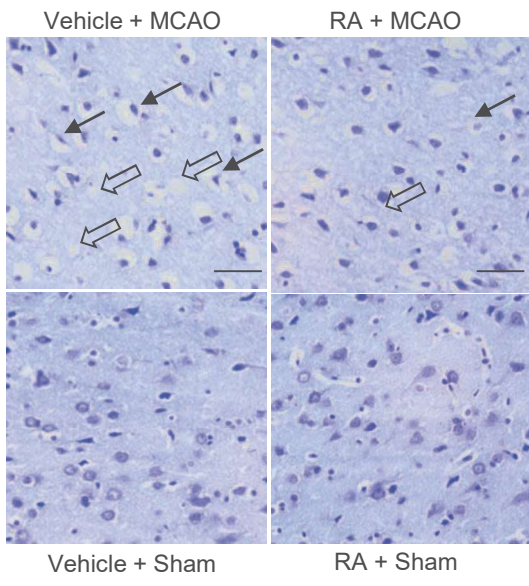

**Vehicle + MCAO**

**RA + MCAO**

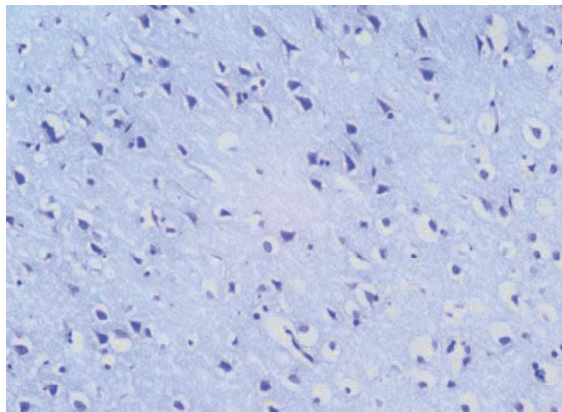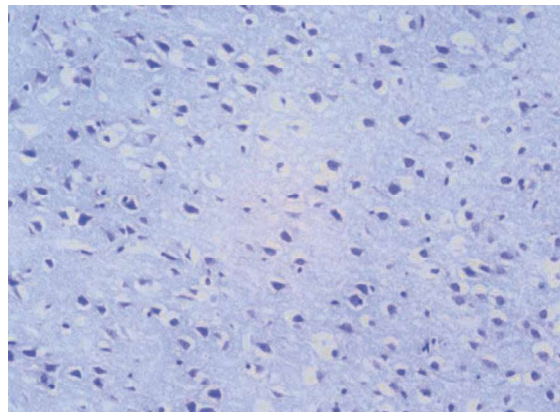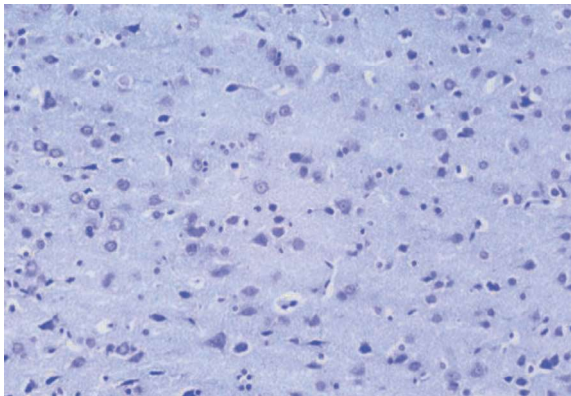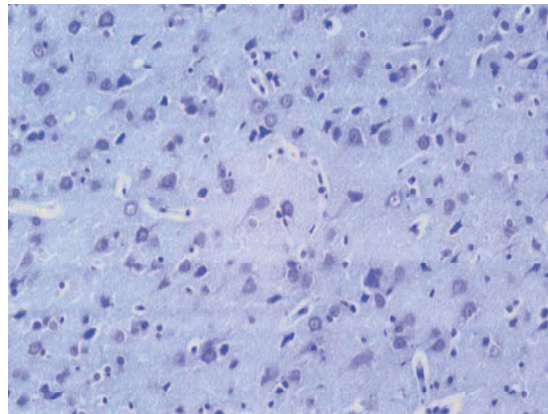

**Vehicle + Sham**

**RA + Sham**
