# Supplementary material for: Retinoic acid alleviates the reduction of Akt and Bad phosphorylation and regulates Bcl-2 family protein interactions in animal models of ischemic stroke
Source: PubMed Central journal article supplement (PMC11098415; doi:10.1371/journal.pone.0303213), 2024-05-16
Supplement: pone.0303213.s010.pdf [file pone.0303213.s010.pdf]

Figure 5B

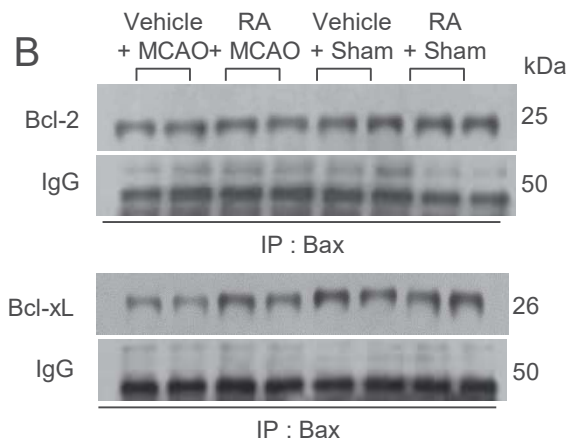

Bcl-2

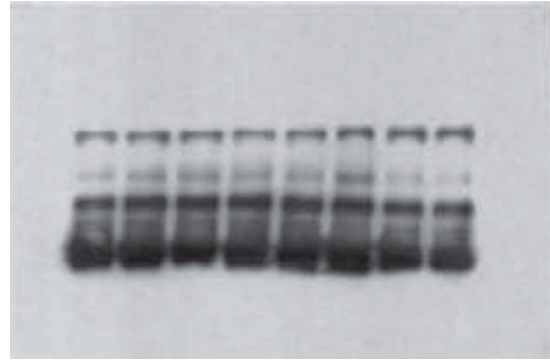

IgG

Bcl-xL

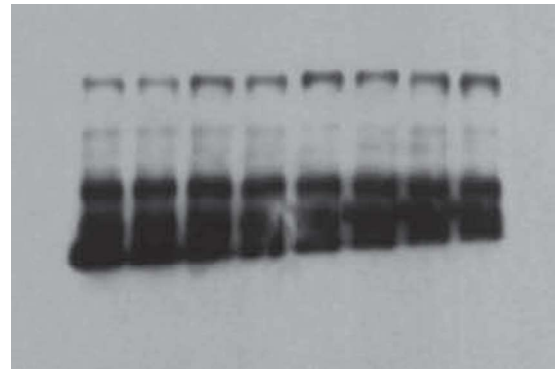

IgG
